# Supplementary material for: Rational design and implementation of a cucurbit[8]uril-based indicator-displacement assay for application in blood serum
Source: Royal Society of Chemistry journal article supplement (doi:10.1039/c9sc00705a), 2019-01-01
Supplement: c9sc00705a2.pdf [file c9sc00705a2.pdf]

# A bloody affair: Novel indicator dye and Cucurbit[8]uril (CB8) conjugate for detection of supramolecules in blood

Low-cost, robust artificial receptors like CB8 can be used as “reporters” for detecting and monitoring drug levels.

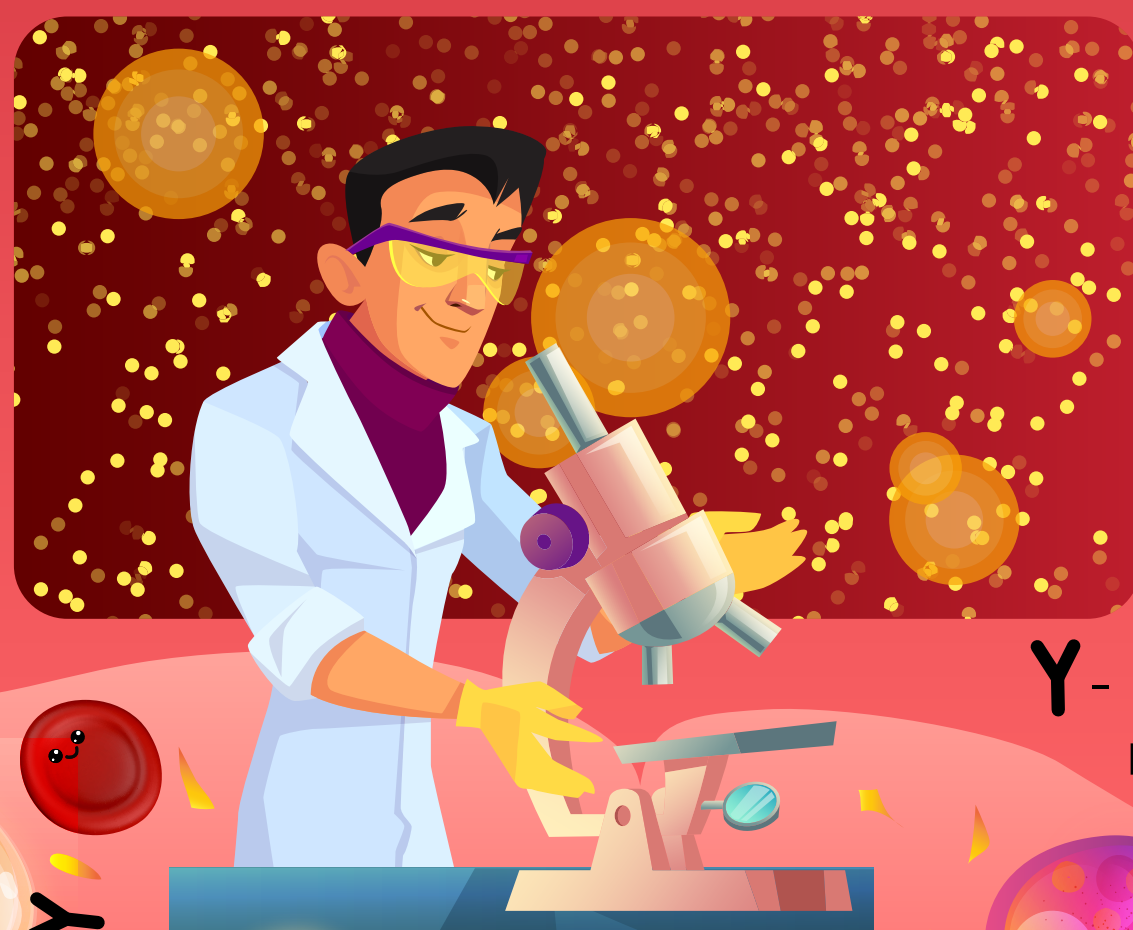

Y - Artificial receptors

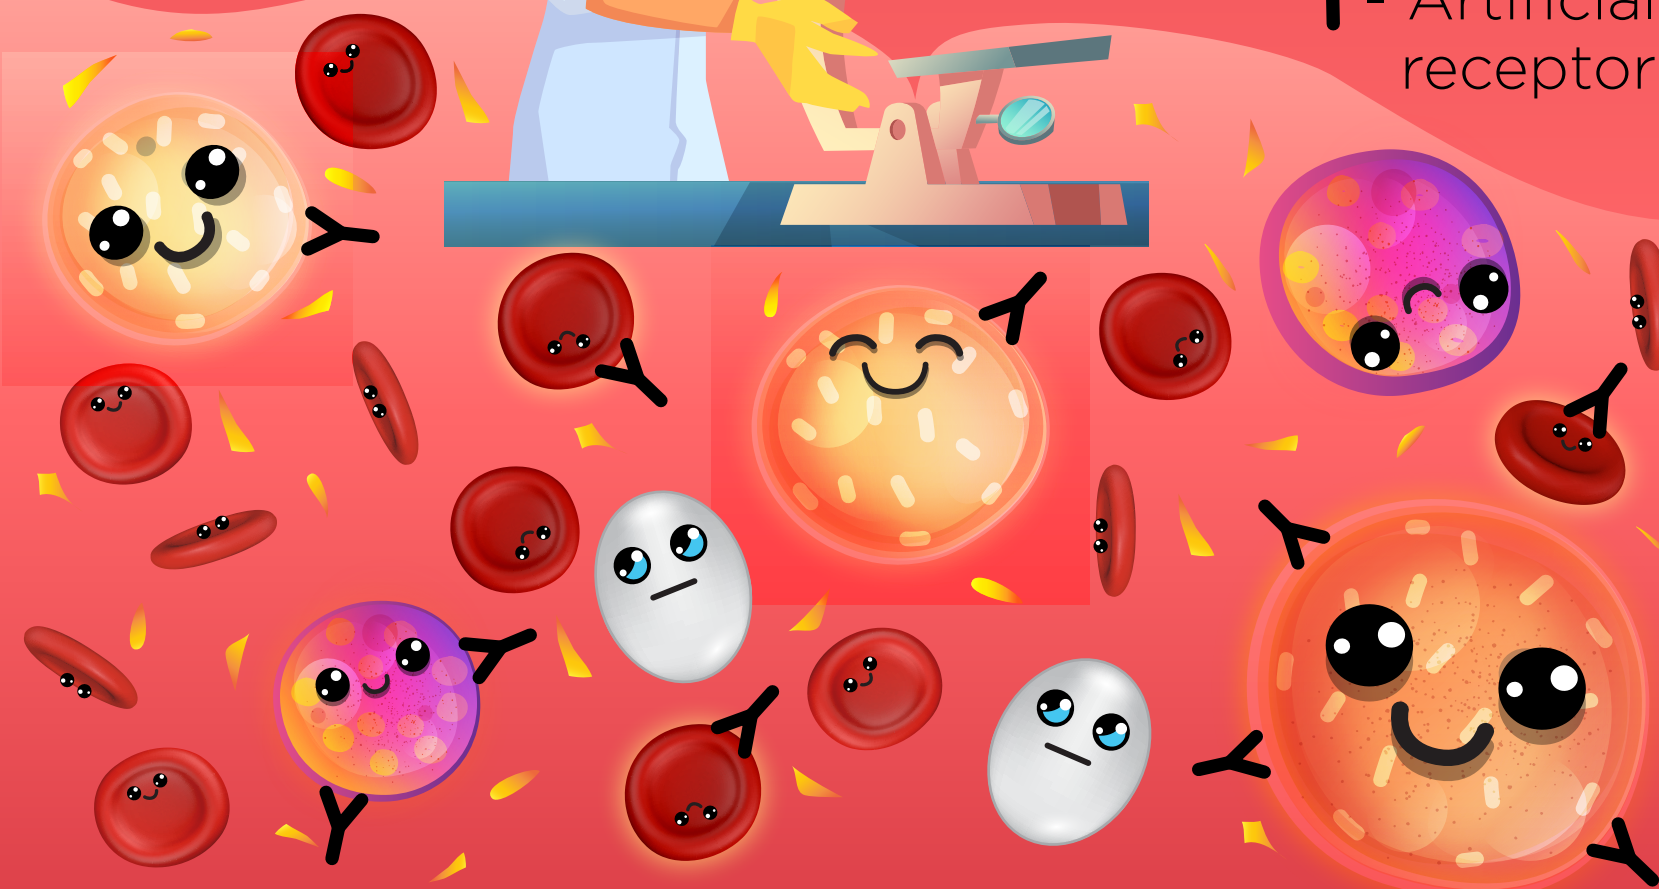

However, numerous molecules are present in blood, which compete to bind with these reporters reducing the effectiveness of such sensing methods.

## Synthesis of novel indicator dye in conjunction with receptor CB8

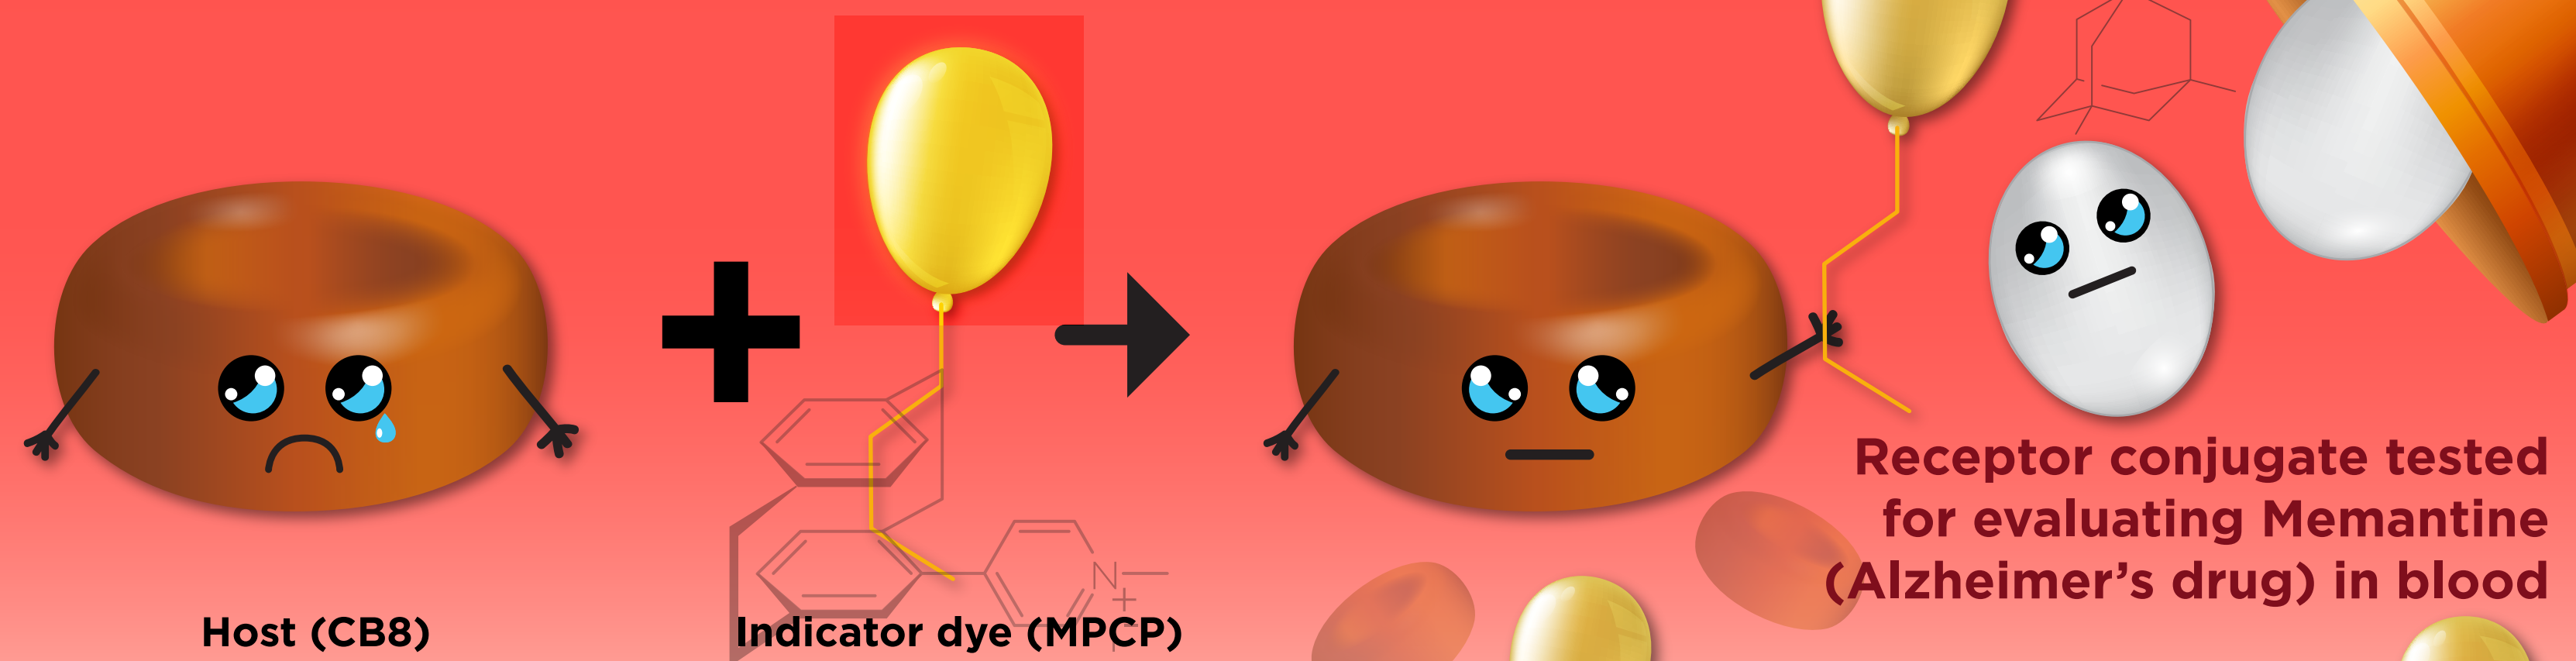

## Benefits of this detection:

- High binding strength
- Accurate estimation
- Purely synthetic hosts
- Sensitive to sample variations
- Fast and inexpensive

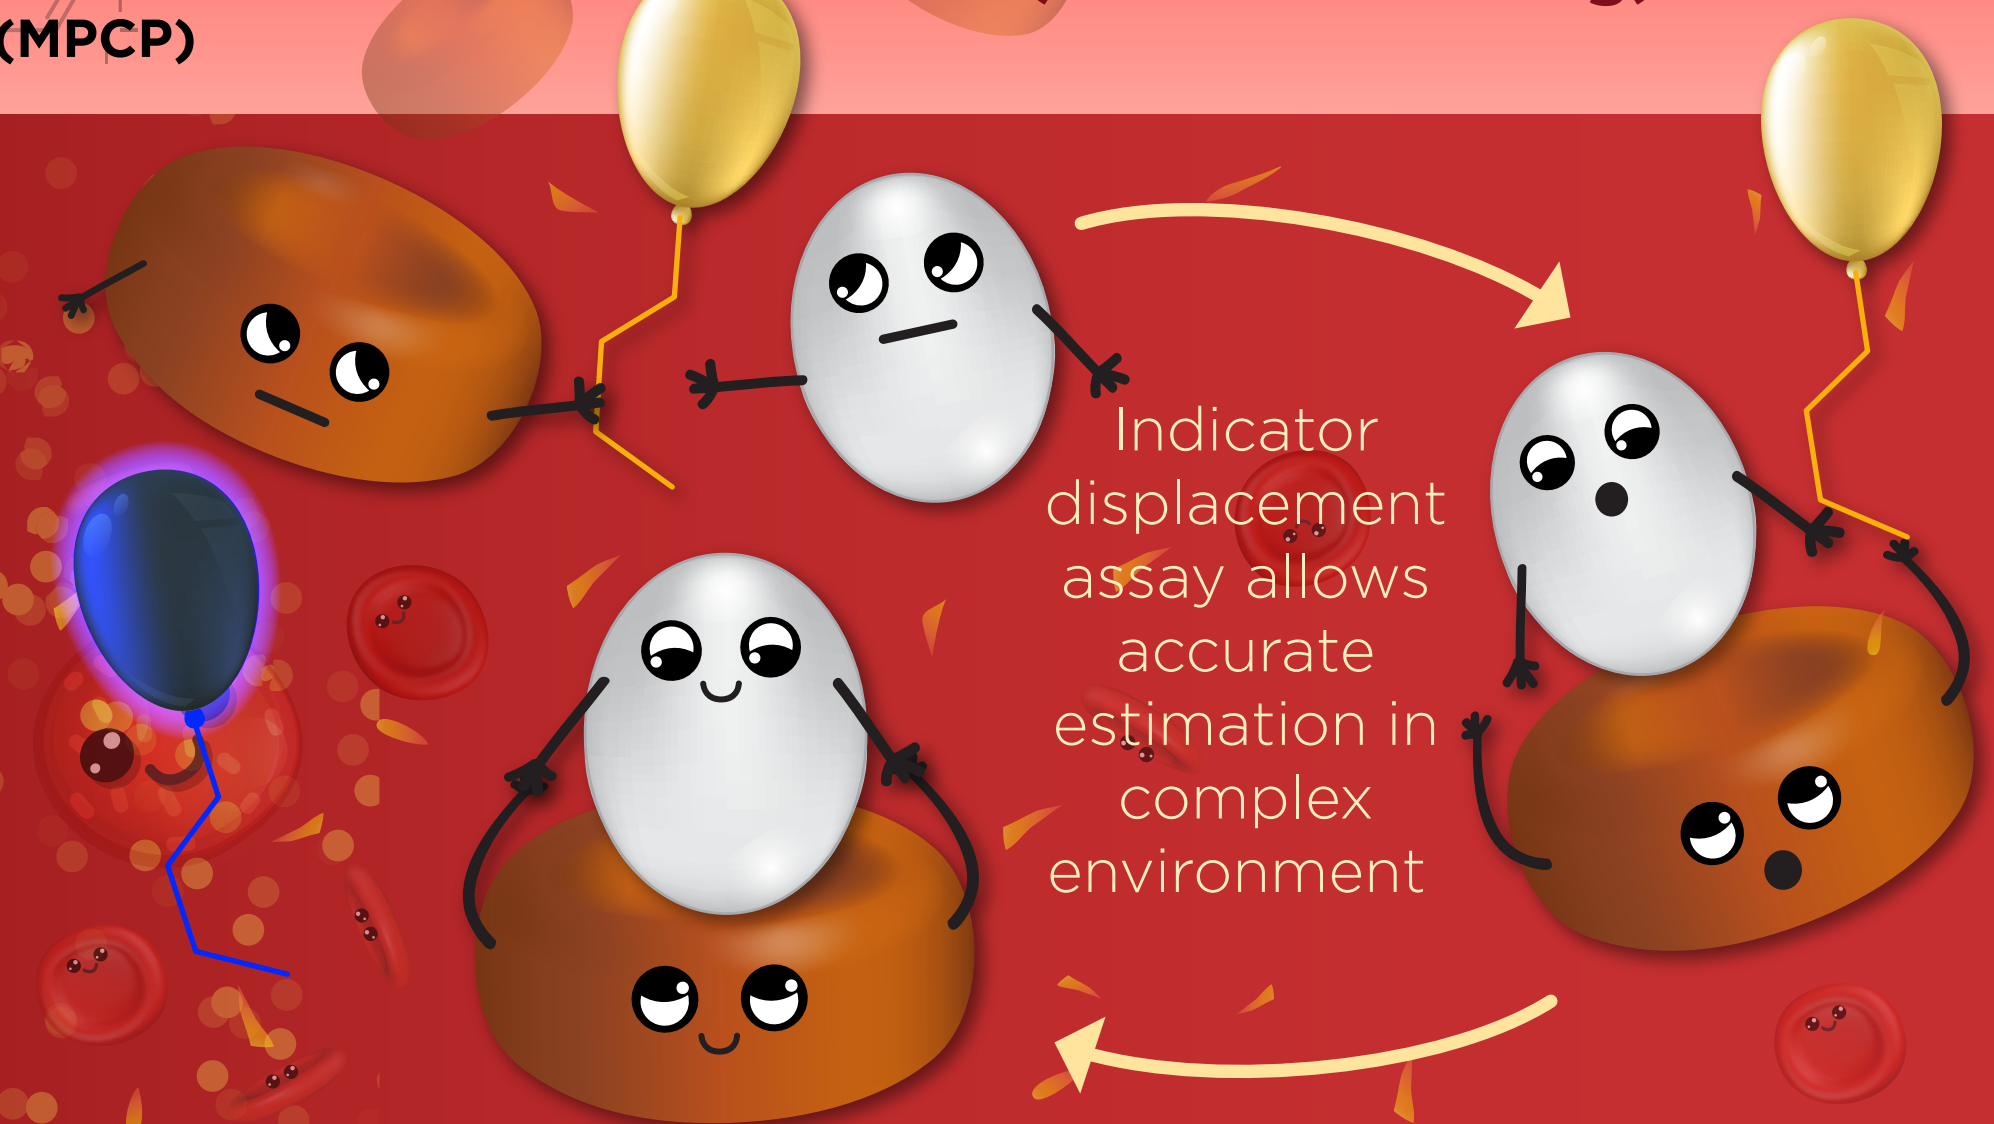

Indicator displacement assay allows accurate estimation in complex environment

**CB8-based chemosensing ensemble exhibits excellent sensing capabilities and could be used for developing diverse blood serum-based supramolecular assays.**
